## **Magnetic resonance spectroscopy of anoxic brain injury after cardiac arrest**

### **Author(s):**

Jong Woo Lee, MD, PhD; Lasya Sreepada, BS; Matthew Bevers, MD, PhD; Karen Li, BBA; Benjamin Scirica, MD; Danuzia Santana da Silva, RN, BSN, MPH; Galen V. Henderson, MD; Camden Bay, PhD; Alexander P Lin, PhD

### **Corresponding Author:**

Alexander P Lin  
aplin@bwh.harvard.edu

**Affiliation Information for All Authors:** Jong Woo Lee, Department of Neurology, Brigham and Women's Hospital, Boston, MA

Lasya Sreepada, Department of Radiology, Brigham and Women's Hospital, Boston, MA

Matthew Bevers, Department of Neurology, Brigham and Women's Hospital, Boston, MA

Karen Li, Department of Neurology, Brigham and Women's Hospital, Boston, MA

Benjamin Scirica, Department of Medicine, Division of Cardiology, Brigham and Women's Hospital, Boston, MA

Danuzia Silva, Department of Medicine, Division of Cardiology, Brigham and Women's Hospital, Boston, MA

Galen V. Henderson, Department of Neurology, Brigham and Women's Hospital, Boston, MA

Camden Bay, Department of Radiology, Brigham and Women's Hospital, Boston, MA

Alexander Lin, Department of Radiology, Brigham and Women's Hospital, Boston, MA

### **Contributions:**

Jong Woo Lee: Drafting/revision of the manuscript for content, including medical writing for content; Major role in the acquisition of data; Study concept or design; Analysis or interpretation of data

Lasya Sreepada: Drafting/revision of the manuscript for content, including medical writing for content; Analysis or interpretation of data

Matthew Bevers: Drafting/revision of the manuscript for content, including medical writing for content; Analysis or interpretation of data

Karen Li: Analysis or interpretation of data

Benjamin Scirica: Drafting/revision of the manuscript for content, including medical writing for content; Major role in the acquisition of data; Study concept or design

Danuzia Santana da Silva: Drafting/revision of the manuscript for content, including medical writing for content; Major role in the acquisition of data

Galen V. Henderson: Drafting/revision of the manuscript for content, including medical writing for content; Major role in the acquisition of data; Study concept or design

Camden Bay: Drafting/revision of the manuscript for content, including medical writing for content; Analysis or interpretation of data

Alexander P Lin: Drafting/revision of the manuscript for content, including medical writing for content; Major role in the acquisition of data; Study concept or design; Analysis or interpretation of data

Number of characters in title: 75

Abstract Word count: 250

Word count of main text: 4498

References: 42

Figures: 4

Tables: 3

**Supplemental:** Response to Reviewers Updated STROBE Checklist

**Statistical Analysis performed by:** Camden Bay, PhD

**Search Terms:** [ 290 ] Cardiac, [ 284 ] EEG; see Epilepsy/Seizures (S), [ 62 ] EEG, [ 120 ] MRI, [ 125 ] MRS

**Study Funding:** The authors report no targeted funding

**Disclosures:**

Jong Woo Lee has performed contract work for Teladoc and Bioserenity, he was the site PI for Engage Therapeutics, he has received research funding from the NINDS, he is the co-founder of Soterya, Inc;

Lasya Sreepada reports no disclosures relevant to the manuscript;

Matthew Bevers is supported by grants from the American Academy of Neurology and National Institute of Neurologic Disorders and Stroke, he reports research funding and personal fees from Biogen, outside the scope of the current work;

Karen Li reports no disclosures relevant to the manuscript;

Benjamin Scirica reports Institutional research grant to Brigham and Women's Hospital from AstraZeneca, Eisai, Novartis, and Merck, consulting fees from AbbVie, Allergan, AstraZeneca, Boehringer Ingelheim, Covance, Eisai, Elsevier Practice Update Cardiology, GlaxoSmithKline, Lexicon, Medtronic, Merck, NovoNordisk, Sanofi, and equity in Health [at] Scale, is a member of the TIMI Study Group which has received institutional research grant support through Brigham and Women's Hospital from: Abbott, Amgen, Aralez, AstraZeneca, Bayer HealthCare Pharmaceuticals, Inc., BRAHMS, Daiichi-Sankyo, Eisai, GlaxoSmithKline, Intarcia, Janssen, MedImmune, Merck, Novartis, Pfizer, Poxel, Quark Pharmaceuticals, Roche, Takeda, The Medicines Company, Zora Biosciences;

Danuzia Silva reports no disclosures relevant to the manuscript;

Galen V. Henderson reports no disclosures relevant to the manuscript;

Camden Bay reports no disclosures relevant to the manuscript; Alexander Lin is a consultant for Agios Pharmaceuticals, Biomarin Pharmaceuticals, Moncton MRI and is cofounder of BrainSpec. He receives research funding from NINDS, NIA, Department of Defense, and the Alzheimers Association.

1 **Abstract**

2 **Objective:**

3 We describe magnetic resonance spectroscopy (MRS) changes in comatose patients  
4 undergoing targeted temperature management (TTM) after cardiac arrest, and their  
5 relationships to relevant clinical, MRI, and EEG variables.

6 **Methods**

7 A prospective cohort of 50 patients was studied. The primary outcome was coma recovery to  
8 follow commands. Comparison of MRS measures in the posterior cingulate gyrus, parietal white  
9 matter, basal ganglia, and brainstem were also made to 25 normative control subjects.

10 **Results:**

11 Fourteen of 50 achieved coma recovery. Compared to patients who recovered, there was a  
12 significant decrease in total N-acetyl-aspartate (NAA/Cr) and glutamate; and an increase in  
13 lactate (Lac/Cr) and glutamine in patients who did not recover, with changes most prominent in  
14 the posterior cingulate gyrus. Patients who recovered had a decrease in NAA/Cr as compared  
15 to control subjects. Coma recovery was seen in patients with a moderate decrease in NAA/Cr,  
16 but the appearance of lactate resulted in a poor outcome. NAA/Cr had a linear relationship with  
17 MRI cortical apparent diffusion coefficient (ADC); lactate level exponentially increased with  
18 decreasing ADC. EEG suppression/burst suppression was universally associated with lactate  
19 elevation.

20 **Conclusions**

21 NAA and lactate changes are associated with clinical/MRI/EEG changes consistent with anoxic  
22 brain injury and are most prominent in the posterior cingulate gyrus. NAA/Cr decrease observed  
23 in patients with good outcomes suggests mild anoxic injury in patients asymptomatic at hospital  
24 discharge. The appearance of cortical lactate represents a deterioration of aerobic energy  
25 metabolism and is associated with EEG background suppression, synaptic transmission failure,  
26 and severe, potentially irreversible anoxic injury.

27 **Introduction:**

28 Anoxic brain injury represents the leading cause of mortality and long-term disability after  
29 cardiac arrest. More than 350,000 adults suffer out-of-hospital cardiac arrest annually in the  
30 United States, after which up to 80% remain comatose immediately thereafter.<sup>1</sup> As clinical  
31 examination may not be sufficiently informative after targeted temperature management (TTM)<sup>2</sup>,  
32 ancillary tests have been utilized to assess prognosis, including EEG, somatosensory evoked  
33 potential (SSEP), MRI, and neuron specific enolase (NSE).

34 MR spectroscopy (MRS) has been utilized along with these other measures in assessing  
35 prognosis.<sup>3</sup> Few studies have examined the range of changes observed in brain-specific  
36 metabolic markers through MRS in adult patients undergoing TTM. In neonatal patients  
37 undergoing TTM for hypoxic-ischemic injury due to birth asphyxia, changes in NAA and choline  
38 (Cho) levels, as measured by MRS, were associated with clinical outcome after TTM, though  
39 there is disagreement regarding the utility of the measurement of lactate (Lac) or the optimal  
40 brain region to be examined.<sup>4,5</sup> Furthermore, previous studies have focused on brain regions  
41 such as the pons, basal ganglia, thalamus, and corpus callosum which for technical reasons  
42 may not provide the most sensitive measure for MRS changes after cardiac arrest. The wide  
43 array of metabolites assessed by MRS allows for simultaneous assessment of both neuronal  
44 integrity and aerobic metabolism, both of which are primary pathologies in anoxic brain injury.

45 We examine changes of several metabolites, as measured by MRS, in patients  
46 comatose after cardiac arrest, comparing 1) patients with good vs poor neurological outcome; 2)  
47 patients with anoxic brain injury to normative control subjects in the posterior cingulate gyrus  
48 (PCG), parietal white matter (PWM), basal ganglia (BG), and brainstem (BS). These results are  
49 placed in the context of their EEG and conventional MRI changes to identify and quantify  
50 markers of anoxic brain injury after TTM and to determine brain regions that are preferentially  
51 affected in anoxic brain injury.

52

53 **Methods:**

54 **Patient cohort and clinical outcome:**

55 This is a single-center prospective study of patients who underwent TTM for coma after  
56 cardiac arrest and return of spontaneous circulation (ROSC) at the Brigham and Women's  
57 Hospital between October 2016 and November 2020. Normative control subjects consisted of  
58 25 athletic male volunteers without a history of head trauma or neurological disease, between  
59 ages 45 and 70 (mean  $57.9 \pm 7.0$ ).

60 The following data points were collected: age, sex, and pulseless rhythm at the time of  
61 arrest (ventricular fibrillation/shockable vs pulseless electrical activity/asystole). Clinical exam  
62 findings included pupillary light response, corneal reflex, and motor response. Motor findings  
63 were dichotomized as flexor response or better (including flexion, withdrawal localization, or  
64 normal function) versus extensor response, triple-flexion, or no response. Motor function was  
65 scored based on the best response in either the upper or lower extremities.

66 The main clinical outcome was defined as **coma recovery** in those patients who  
67 regained the ability to open eyes and follow commands before hospital discharge; any response  
68 less than this was considered a poor outcome. As some patients were able to follow commands  
69 but were still cognitively impaired, we identified patients with a cognitive return to baseline.  
70 Cerebral performance category (CPC) at discharge were binarized to good (CPC 1-2) or poor  
71 (CPC 3-5) outcome.<sup>6</sup>

72 **Cardiac arrest protocol:**

73 TTM was performed according to the previously published local protocol.<sup>7</sup> Eligible resuscitated  
74 cardiac arrest patients received TTM at 33°C or 36°C for 24 hours, using ice packs and a  
75 surface cooling device (Arctic Sun System, Medivance, Louisville, CO). Patients were intubated  
76 and sedated for 24 h with Propofol (0-83 mcg/kg/min) or midazolam (0-3 mg/h), and fentanyl (25  
77 mcg/h). Cisatracurium (0.15 mg/kg IV q10min PRN, escalated to infusion at 0.5 mcg/kg/min for  
78 persistent shivering) was administered for shivering. After 24 hours, patients were rewarmed by

79 0.25°C/hour. When clinically feasible, sedation was lightened after return to normothermia for  
80 clinical assessments. Withdrawal of life-sustaining treatment (WLST) was performed on a case-  
81 by-case basis through informed decision-making by the patient's family or guardian in close  
82 collaboration with the medical team and the patient's family members.

### 83 **EEG**

84 Continuous video EEG (cEEG) monitoring (Natus XLTEK system, Pleasanton, CA) was placed  
85 according to the international 10-20 system as soon as possible after starting TTM. Patients  
86 were recorded for a minimum of 24h after normothermia was achieved. EEG data were  
87 interpreted using the American Clinical Neurophysiology Society (ACNS) critical care EEG  
88 terminology<sup>8</sup> and classified into 3 categories (highly malignant, malignant, benign) per Westhall  
89 et al.<sup>9</sup> EEG assessment was made on the day of the MRI/MRS study.

### 90 **Neuroimaging**

#### 91 ***MRI:***

92 MRI and MRS scans were performed on a 3T Siemens Verio MRI scanner using a 32-channel  
93 head coil, on a mean of  $6.4 \pm 6.3$  days (median 4.8 days) after cardiac arrest. Structural imaging  
94 included 3D T1-weighted (MPRAGE:  $1 \times 1 \times 1$  mm<sup>3</sup>, TR= 2530.0 ms, TE= 3.36 ms) and diffusion-  
95 weighted images. Regional analysis of ADC images was carried out using FSL (Oxford Center  
96 for Functional MRI of the Brain, Oxford, UK).<sup>10</sup> ADC images were first co-registered to the T1  
97 weighted image for each subject. The T1 images were then non-linearly registered to the  
98 Montreal Neurologic Institute (MNI) Brain Atlas, and the same transformation was applied to the  
99 ADC images. The success of automated registration was then manually confirmed. Artifacts  
100 were removed by filtering out signal intensity less than 200 mm<sup>2</sup>/s, while CSF was removed by  
101 filtering signal intensity greater than 2000 mm<sup>2</sup>/s. Regional anatomical masks were created  
102 using a 50% probability map from the MNI atlas. Mean ADC signal intensity was then calculated  
103 for each region. The percentage of whole brain and cortical voxels with ADC values < 650  
104 mm<sup>2</sup>/s were similarly calculated from whole brain and cortical anatomical maps.

105 **MRS:**

106 Due to limitations imposed by the local institutional review board, MRS was obtained only with a  
107 concurrent clinically indicated MRI. MRS was performed in four brain regions using a single  
108 voxel PRESS sequence (TE=30ms, TR=2000ms, 20x20x20 mm<sup>3</sup>, 128 averages). The use of a  
109 short echo time allows for the characterization of additional metabolites other than NAA, Cr, and  
110 Cho, such as glutamate, glutamine, and myoinositol. Previous studies utilized long echo times  
111 (TE > 144 ms) whereby these additional metabolites can no longer be detected due to their  
112 relatively fast relaxation times. Brain regions include the PCG, PWM, left BG, and BS as shown  
113 in Figure 1. The reason for selecting the PCG and PWM is that these regions have been shown  
114 to be highly sensitive to anoxic/hypoxic injury<sup>11</sup> and are sites of reduced cerebral perfusion.<sup>12</sup>  
115 The BG and BS were acquired so that they could be compared to other MRS studies in anoxia<sup>3-</sup>  
116 <sup>5</sup>. Anatomical landmarks from the T1-weighted images determined voxel locations, and  
117 subsequently, automated optimization (3D shimming, transmit gain, frequency adjustment, and  
118 water suppression) was performed on the voxel. When necessary, MRI technicians manually  
119 shimmed to a line width of <15 Hz of the full-width half maximum (FWHM) of the unsuppressed  
120 water spectrum in the basal ganglia and brainstem. Manual shimming was not required for the  
121 PCG or PWM as both of these regions have excellent B0 homogeneity. This is another  
122 advantage of utilizing these voxel locations. MRS of the BG (2 patients) and BS (12 patients)  
123 were not obtained due to time constraints.

124 Single-voxel MRS raw data were pre-processed using singular value decomposition  
125 (SVD)-based channel combination, spectral registration to correct for frequency drift, and water  
126 suppression using the Hankel SVD method and OpenMRSLab.<sup>13</sup> Metabolites were then fit and  
127 quantified using linear combination models (LCModel)<sup>14</sup> yielding the following measurements:  
128 total NAA (including NAA + NAA-Glutamate), total creatine (Cr, including Cr + PhosphoCr), total  
129 Cho (including PhosphoCho + Cho), Glutamate (Glu), Glutamine (Gln), Glutamate+Glutamine  
130 (Glx), myoinositol (ml), and lactate (Lac). Cr concentrations were not significantly different

131 between the different cohorts and therefore used to normalize the data across the study.  
132 Normative control scans used for comparison were acquired using the same scan protocol  
133 (PCG and PWM) and on the same scanner.

134 In all subjects, major metabolites of NAA, Cr, Cho, and ml had Cramer-Rao Lower  
135 Bounds (CRLB) of less than 20%. Due to the high CRLB of Lac at very low concentrations, the  
136 data was not filtered to include subjects with low Lac to avoid any study bias.<sup>15</sup>

### 137 **Statistical Analysis:**

138 Comparative statistics (Student's independent samples t-test, Fisher's exact test, Wilcoxon  
139 rank-sum test) were used as appropriate. Statistically significant results were evaluated using a  
140 multivariable logistic regression model with dichotomized coma recovery as well as CPC at  
141 hospital discharge (1-2 vs 3-5) as dependent variables. Correlations between variables of  
142 interest were assessed using Spearman's correlation with 95% confidence intervals. Multiple  
143 comparisons were adjusted for using a false discovery rate set at 0.05.<sup>16</sup> P-values presented in  
144 the manuscript text are the raw p-values; all p-values are also presented in Tables 1 and 2 with  
145 an indication of their statistical significance after adjustment for multiple comparisons. Receiver  
146 operating characteristic (ROC) analyses were performed to obtain discrimination thresholds.  
147 Calculations were performed using R 3.3.2 ([www.R-project.org](http://www.R-project.org)).

### 148 **Classification of Evidence:**

149 The study provides Class IV evidence of MRS changes in anoxic brain injury after cardiac  
150 arrest.

### 151 **Standard Protocol Approvals, Registration, and Patient Consents:**

152 The Institutional Review Board approved this study, and consent was obtained for each  
153 patient by the legally authorized representative unless MRS was performed as part of clinical  
154 care.

### 155 **Data Availability Policy**



156 Data will be shared at the request of other investigators for purposes of replicating procedures  
157 and results.

158

## 159 **Results:**

### 160 **Characteristics of Study Cohort**

161 A total of 51 comatose patients after cardiac arrest underwent TTM, cEEG, MRI, and MRS. One  
162 patient was excluded due to presentation with a large posterior circulation stroke immediately  
163 before cardiac arrest, resulting in a total of 50 patients who underwent analysis. Of these, 14  
164 had coma recovery, of whom 7 returned cognitively to baseline; all patients had benign EEGs  
165 (Table 1). Three patients who did not have coma recovery survived, remaining comatose at  
166 hospital discharge (CPC=4). One patient was awake, spontaneously moving extremities, and  
167 was noted to follow 1-step commands approximately 75% of the time (CPC=3). There were no  
168 meaningful differences in age, sex, or race. Patients who recovered were statistically  
169 significantly more likely to have intact corneal reflexes (100% vs 55.6%,  $p=0.002$ ) and motor  
170 movements better than flexion (100% vs 11.1%,  $p<0.001$ ).

171 MRS peaks were evaluated for effect of time elapsed to scan after cardiac arrest. Time  
172 to scan revealed a statistically significant positive correlation with NAA/Cr ( $r_s=0.43$  95%  
173 confidence interval = [0.17, 0.63],  $p=0.002$ ) and a negative correlation with log(Lac/Cr) ( $r_s=-0.40$   
174 [-0.11, -0.60],  $p=0.007$ ).

175

### 176 **Persistent coma is associated with reduced NAA/Cr and increased Lac/Cr** 177 **compared to patients with coma recovery and control subjects**

178 PCG NAA/Cr was statistically significantly lower in patients who did not have coma recovery as  
179 compared to those who did (0.82 vs 1.26,  $p<0.001$ ), with an AUC of 0.96 (Tables 1 and 2,  
180 Figure 2). The Optimal cut-off, defined as the value-maximizing Youden's J statistic<sup>17</sup>, was 1.11  
181 for a sensitivity of 85.7 and specificity of 86.5%. None of the patients with an NAA/Cr ratio under

182 0.98 recovered; 33% of patients between 0.98 and 1.2 recovered, and all patients above 1.2  
183 recovered. PCG NAA/Cr was significantly lower in patients who died, as compared to those who  
184 survived (mean NAA/Cr ratio of 0.79 vs 1.20,  $p < 0.001$ ).

185 PCG Lac/Cr was statistically significantly higher in patients who did not have coma  
186 recovery (0.39 vs 0.04,  $p < 0.001$ , Table 2), with an ROC AUC of 0.91. There was one outlier  
187 survivor whose Lac/Cr was higher than expected (0.136). Although included for purposes of  
188 completeness, there were technical difficulties with the scan; a water reference was not  
189 obtained, which may have affected scaling ratios.

190 PCG Lac/Cr was also compared to peak serum lactate during admission, and serum  
191 lactate level in closest proximity to the MRS scan, all but one of which were within 72 hours.  
192 There was no statistically significant relationship between PCG MRS Lac/Cr peak and peak  
193 serum lactate ( $r_s = 0.09$ , 95% CI [-0.20, 0.36]) or with serum lactate in the proximity of the MRS  
194 ( $r_s = 0.17$  [-0.12, 0.42]).

195 In the PWM, BG, and BS, there were smaller differences in NAA/Cr and Lac/Cr between  
196 patients who did or did not achieve coma recovery. Only differences in Lac/Cr peaks reached  
197 statistical significance before multiple comparisons correction in the WM and BG.

198

## 199 **Patients with coma recovery have reduced NAA/Cr as compared to control** 200 **subjects**

201 Patients were compared to control subjects with no history of brain injury or trauma. In patients  
202 without coma recovery, the following statistically significant changes were observed:

- 203 - Decrease in NAA/Cr (PCG [0.82 vs 1.40,  $p < 0.001$ ], PWM [1.48 vs 1.87,  $p < 0.001$ ],  
204 adjusted for multiple comparisons)
- 205 - Decrease in GABA (PCG [0.19 vs 0.27,  $p < 0.001$ ], PWM [0.20 vs 0.23,  $p < 0.001$ ]),
- 206 - Decrease in glutamate (PCG [0.97 vs 1.24,  $p < 0.001$ ])
- 207 - Decrease in Glx (PCG [1.74 vs 2.10,  $p = 0.010$ ], PWM [1.18 vs 1.36,  $p < 0.001$ ])

- 208 - Decrease in MI/Cr (PCG [0.55 vs 0.75,  $p<0.001$ ])
- 209 - Increase in Lac/Cr (PCG [0.39 vs 0.073,  $p<0.001$ ] and PWM [0.43 vs 0.22,  $p<0.001$ ])
- 210 - Increase in glutamine/Cr (PCG [1.12 vs 0.48,  $p<0.001$ ], PWM [0.47 vs 0.30,  $p<0.001$ ]).

211 In patients with coma recovery, NAA/Cr was significantly lower (PCG [1.26 vs 1.40,  
212  $p<0.001$ ], PWM [1.71 vs 1.87,  $p=0.008$ ], in addition to a decrease in glutamate (PCG [1.12 vs  
213 1.24,  $p=0.030$ ]), and an increase in glutamine (PWM [0.41 vs 0.30,  $p=0.003$ ]). No other peaks  
214 were statistically significantly different between the two populations, specifically, no difference in  
215 Lac/Cr was seen. These changes were still present in patients with coma recovery who had a  
216 cognitive return to baseline; NAA/Cr were lower in PCG (1.26 vs 1.40,  $p=0.001$ ) and PWM (1.76  
217 vs 1.87,  $p=0.035$ ) and glutamine/Cr elevated (0.43 vs 0.30,  $p=0.020$ ). These findings suggest  
218 that patients with coma recovery still sustained an anoxic injury, but not at the same scale as  
219 the non-recovered patients.

220

## 221 **Reduced MRI ADC signal intensity is associated with NAA/Cr reduction and** 222 **lactate elevation**

223 There were significant reductions in MRI ADC measures in patients who did not have coma  
224 recovery in the whole brain, cortex, hippocampus, and white matter, with the cortex being most  
225 significantly affected (Table 1). Correlation between PCG NAA/Cr and ADC values were  
226 examined for mean total brain ADC as well as mean ADC values for individual brain regions.

227 There were significant correlations with the cerebellum, cortex, hippocampus, globus pallidus,  
228 putamen, BG (combined), and white matter regions. Correlation between NAA/Cr and ADC was  
229 linear (Figure 3), and it was strongest with cortical ADC values ( $r_s=0.65$  [0.45, 0.79],  $p<0.001$ ).

230 In comparison, there was a negative log-linear relationship between PCG Lac/Cr and cortical  
231 ADC ( $r_s=-0.74$  [-0.58, -0.84],  $p<0.001$ ).

232 White matter ADC values were correlated to PWM Lac/Cr ( $r_s=-0.46$  [-0.35, -0.74],  
233  $p=0.0044$ ) with a trend towards correlation with PWM NAA/Cr ( $r_s=0.28$  [-0.0001, 0.52],  $p=0.052$ ).

234 Basal ganglia ADC values were correlated to NAA/Cr ( $r_s=0.39$  [0.008, 0.68],  $p=0.047$ ) with a  
235 tend towards correlation with Lac/Cr ( $r_s=-0.41$  [-0.023, 0.69] but  $p=0.06$  after multiple  
236 comparisons). Correlations between PWM and BG metabolites and ADC values from  
237 corresponding brain regions were otherwise not statistically significant.

238

239 **Continuous background on EEG is associated with higher NAA/Cr; suppressed or burst**  
240 **suppressed EEGs are associated with Lac/Cr production**

241 Patients who had a continuous EEG background had higher NAA/Cr than patients with a  
242 discontinuous background (0.79 vs 1.18,  $p<0.001$ ), and less likely to have a Lac/Cr over 0.14 (5  
243 of 21 vs 26 of 29,  $p<0.001$ ). Patients who did not recover from coma nearly always had  
244 discontinuous, burst suppressed, or completely suppressed EEGs whereas all patients who  
245 recovered had a continuous background on EEGs (Table 1). Reactivity to stimulation, though  
246 not tested or determinable in all patients, was more often present in patients who recovered  
247 ( $p<0.001$ ). There were no differences in the number of patients who had status epilepticus,  
248 generalized periodic discharges, or myoclonus. All patients with suppressed EEG backgrounds  
249 at the time of MRS/MRI scans had elevated PCG Lac/Cr peaks of at least 0.331. All patients  
250 with burst suppressed EEGs had PCG Lac/Cr peaks of at least 0.167.

251 In patients who did not achieve coma recovery, Lac/Cr was lower in patients who  
252 experienced a seizure during any time of their hospitalization than patients who did not (0.452  
253 vs 0.163,  $p=0.0048$ ). No changes in lactate in relation to seizures were seen in patients who  
254 achieved coma recovery.

255

256 **Discussion:**

257 This study demonstrates the spectrum of metabolic changes on MRS in patients after anoxic  
258 brain injury; relationships with clinical, MRI, and electrographic markers of anoxic brain injury  
259 were as follows:

- 260 1. Poor coma recovery was associated with a decrease in PCG NAA/Cr by approximately  
261 35% and elevated lactate production (in our cohort, Lac/Cr >0.14).
- 262 2. MRS assessment had the highest association with coma recovery in the PCG as  
263 compared to PWM, BG, or BS.
- 264 3. There is a linear relationship between cortical ADC values on MRI and PCG NAA/Cr and  
265 there is an exponential increase in PCG lactate with decreasing cortical ADC, (e.g.  
266 increasing cortical diffusion restriction).
- 267 4. Continuous background on EEG was associated with higher PCG NAA/Cr; EEGs that  
268 are suppressed or burst suppressed at the time of the MRS were universally associated  
269 with lactate production.

270

271 We observed a decrease in NAA/Cr values in patients with coma recovery as compared  
272 to normative control subjects. This decrease persisted even in patients who had cognitive return  
273 to baseline at bedside exam, though full neuropsychological evaluations were not performed.  
274 We hypothesize that this is likely the result of mild anoxic injury, rather than TTM itself exerting  
275 non-specific changes in the MRS spectra once the patient has been rewarmed. It is unclear  
276 whether these patients experienced more subtle longer-term cognitive or other deficits, despite  
277 their good functional outcome at hospital discharge. Previous studies have demonstrated long-  
278 term cognitive deficits in >40% of survivors of cardiac arrest.<sup>18</sup> Interventions in addition to TTM  
279 to preserve structural and metabolic integrity after resuscitation to optimize neurological  
280 recovery, even in patients who appear to have excellent in-hospital outcomes, should be  
281 explored in future studies. Recent preclinical and clinical studies have suggested promising  
282 effects of noble gases<sup>19</sup> and citicoline<sup>20</sup> as neuroprotective agents.

283 Our cohort demonstrates a tight coupling between NAA/Cr and MRI ADC values. ADC  
284 measures the impedance of water molecule diffusion and assesses cell membrane integrity.<sup>21</sup>  
285 NAA is a molecule found in the brain at high concentrations that is sensitive in a nonspecific

286 manner to several neurologic disorders and has been postulated to be a marker of neuronal  
287 health and bioenergetic dysfunction.<sup>22, 23</sup> The high degree of linear correlation of these two  
288 disparate measurements in the cortex further suggests that the cortex has the greatest  
289 sensitivity to anoxic injury, as compared to other sampled brain regions.

290 This study also highlights the importance of the appearance of a lactate peak. Although  
291 there was an overlap of NAA/Cr and ADC values in patients who had coma recovery vs those  
292 who did not, the appearance of a lactate peak in the PCG with a concentration of 0.14, on the  
293 other hand, was more consistently associated with the absence of coma recovery.

294 Electrographically, complete background suppression or burst suppression, which are patterns  
295 that have been demonstrated to be associated with poor outcome in multiple studies<sup>9, 24</sup>, were  
296 consistently associated with a lactate peak. As such, the emergence of a lactate peak may  
297 represent a point of irreversible brain injury from which coma recovery is not possible.

298 As such, we hypothesize that MRS changes provide an in-vivo view of the major  
299 pathophysiological processes in anoxic brain injury that may occur at different severities (Figure  
300 5). NAA/Cr may be representative of early injury that may be most sensitive but potentially  
301 nonspecific for poor outcome. Most patients with a mild decrease in NAA/Cr and ADC achieve  
302 coma recovery. Increasing severity of injury results in only a portion of patients recovering.  
303 Injury severe enough to cause an increase in lactate represents severe, potentially irreversible  
304 anoxic injury. Lactate levels as measured by MRS have been demonstrated to be a reliable  
305 marker of outcome after stroke.<sup>25</sup> In a rat model, hypothermia induced neuroprotection-related  
306 metabolic changes were seen, including an increase in Lac and MI, and a decrease in Glu.<sup>26</sup>

307 The mechanism of elevated lactate peak in severe anoxic injury may be viewed in terms  
308 of the integrity of oxidative metabolism. Rapid depletion of ATP after cessation of cerebral  
309 perfusion causes failure in the membrane ATP-dependent Na/K pumps, resulting in a massive  
310 influx of Na, efflux of K, and membrane depolarization. This results in opening voltage-gated Ca  
311 channels resulting in large increases in intracellular Ca, activation of Ca-dependent K channels,

312 resulting in further loss of selective membrane permeability.<sup>27</sup> Lactate levels rise almost  
313 immediately occurs as a result of a switch to anaerobic glycolysis, which quickly returns to  
314 baseline if perfusion is restored and normal mitochondrial function is resumed. Accumulation of  
315 lactate after re-establishment of perfusion is due to secondary energy failure in which neurons  
316 that survive the initial insult develop energy depletion from mitochondrial failure<sup>28, 29</sup>; elevated  
317 MRS lactate at 48 hours is associated with cell death and microglial activation in animal  
318 models<sup>30</sup>, and the accumulation of lactate portended an extremely poor outcome in pediatric  
319 hypoxic-ischemic injury.<sup>31, 32</sup> Failure to re-establish membrane gradient results in cytotoxic  
320 edema, cessation of cerebral perfusion, and neuronal transmission.

321         The failure of oxidative metabolism, as evidenced by lactate generation and its  
322 relationship to synaptic activity, may account for the consistent findings of either burst  
323 suppression or severe background voltage suppression seen in this cohort. Approximately 75-  
324 80% of the brain's energy requirements are for signal processing, predominantly for the  
325 generation of action potentials and postsynaptic actions of neurotransmitters, predominantly  
326 glutamate.<sup>33, 34</sup> The generation of EEG signals is due to a summation of local field potentials, the  
327 most important source of which is synaptic activity<sup>35</sup>. Varying levels of damage to the excitatory  
328 synapses have been demonstrated to recapitulate the various EEG abnormalities seen in  
329 postanoxic EEGs, including burst suppression and discontinuous low voltage recordings.<sup>36</sup>  
330 Although it is likely that presynaptic ischemic failure is the initial cascade in inhibiting synaptic  
331 transmission in mild-moderate ischemia,<sup>34</sup> severe and widespread failure in synaptic  
332 transmission is likely coupled to the impairment of oxidative metabolism.

333         One unexpected finding is the increase in glutamine in patients with poor outcomes.  
334 Glutamate and glutamine are preferentially used as metabolic and cataplerotic substrates in the  
335 Krebs cycle during anoxia and ischemia. They may also function as reservoirs to protect against  
336 post-ischemic reduction in cardiac output by maintaining metabolic intermediates. The  
337 biosynthesis of glutamine from glutamate amidation is catalyzed by the enzyme glutamine

338 synthetase (GS); after the release and reuptake of glutamate into neurons and glia, glutamate is  
339 catalyzed back to glutamine and ammonium by mitochondrial phosphate-activated glutaminase  
340 (PAG). GS activity increases in response to acute hypoxic-ischemic nervous system injury in  
341 children and other compensatory mechanisms prevail in the case of chronic hypoxic-ischemic  
342 insults.<sup>37</sup> In cell culture models of hypoxia, PAG activity is inhibited, potentially by the acidic pH  
343 induced by lactic acidosis.<sup>38, 39</sup> The combination of increased glutamine synthetase activity and  
344 inhibition of phosphate-activated glutaminase may play a rescue role in preventing glutamate-  
345 induced injury. Separating the glutamine and glutamate resonances remains challenging, and  
346 further studies are required to confirm these findings.

347 Our study is in agreement with a large European study that demonstrated that NAA/Cr  
348 ratios measured in the pons and thalami were significantly lower in patients with unfavorable as  
349 compared to favorable outcomes for MRI/MRS obtained between 7 and 28 days after cardiac  
350 arrest.<sup>3</sup> Differences from our study include that their study reported only MRS values of the  
351 thalamus and pons, included patients both patients who did and did not undergo TTM, and  
352 included only patients who had survived for 7 days after cardiac arrest. PCG is more sensitive  
353 for identifying MRS changes when compared to the PWM, BG, and BS. Furthermore, we  
354 demonstrate a robust correlation between single voxel spectra of the PCG and both cortical and  
355 whole-brain ADC, suggesting that spatial sampling bias may be less relevant as loss of  
356 perfusion as well as reperfusion is global. Future studies with multivoxel spectroscopy will help  
357 to fully elucidate regional variations.

### 358 **Study Limitations**

359 The sample size is too small to develop a multimodal outcome prediction model. This  
360 also likely explains the lack of association between coma recovery and status epilepticus,  
361 generalized periodic discharges, or myoclonus. The cut-off values are thus representative of  
362 only our dataset. Voxel selection did not target regions of greatest ADC or T2 changes on MRI  
363 scans, potentially decreasing MRS effect size. However, this minimized variability in



364 signal/noise characteristics of different brain regions and allowed the generalizability of findings  
365 across subjects. As MRS scans were only obtained with a clinically necessary MRI scan, there  
366 is variability in the timing of the image acquisition and potential selection bias. Although there  
367 were correlations between time elapsed to scan and MRS peaks, this may reflect a strong bias  
368 for patients with clinical suspicion of poor outcome to be scanned earlier in their course of  
369 hospitalization. Previous MRS studies in stroke<sup>25</sup> and neonatal hypoxic-ischemic injury<sup>40</sup>  
370 demonstrated a sustained decrease in NAA and a more transient increase in Lac. Without  
371 longitudinal MRS data, we are unable to determine the nature of MRS peak changes over time.  
372 Cortical ADC values of survivors are higher than typically seen in other studies, likely due to our  
373 selection of a more conservative cut-off value of 2000 mm<sup>2</sup>/s to remove artifacts<sup>41</sup>, likely  
374 resulting in the inclusion of high ADC CSF voxels. Nonetheless, our results remained robust  
375 across a range of other cut-off values (1000 mm<sup>2</sup>/s and 1500 mm<sup>2</sup>/s).

376 NSE and SSEPs were not routinely obtained on every patient, and a pupillometer was  
377 not utilized. We assessed cognitive return to baseline to the patient's estimated premorbid  
378 baseline on bedside exam. A detailed neuropsychological evaluation, which was not performed,  
379 would be required to fully assess residual deficits. WLST was performed on a case-by-case  
380 basis and may potentially conflict with objective prognostic measures and treating clinicians  
381 were aware of the MRS results. The choice of coma recovery defined as following commands,  
382 rather than CPC, as the primary clinical outcome, minimized the effect of these variabilities.

383 As with any testing modality, care must be taken in avoiding overreliance on a single  
384 measure including the MRS, as demonstrated by one patient who underwent 2 MRS scans. A  
385 female in her 40's sustained a PEA arrest, thereafter experienced myoclonic status epilepticus.  
386 MRI/MRS were obtained 4 days and 7 days after cardiac arrest; while neither scan revealed  
387 lactate or ADC changes, NAA/Cr of the basal ganglia decreased 20.9% between the two scans.  
388 The patient eventually made a full recovery, without chronic seizures or observable cognitive  
389 deficits on long-term follow-up.

390

391 **Conclusions:**

392 This study shows marked differences in several MRS detectable metabolites in cardiac arrest  
393 patients undergoing TTM who achieved coma recovery, as compared to those who did not.  
394 NAA/Cr and diffusion restriction changes are linearly correlated. The increasing severity of the  
395 injury is associated with the emergence of a rapidly increasing lactate peak, which was  
396 associated with either burst or complete suppression on EEG, and from which no patients  
397 recovered. Metabolic changes may be seen after TTM as compared to normative controls even  
398 in patients with presumed excellent recovery. This suggests that some amount of neuronal  
399 injury and breakdown in cellular microarchitecture may be tolerated, whereas compromise to  
400 aerobic oxidative metabolism represents severe, potentially irreversible anoxic brain injury.

401

## 402 **References**

- 403 1. Mozaffarian D, Benjamin EJ, Go AS, et al. Heart Disease and Stroke Statistics—2016 Update.  
404 *Circulation* 2016;133:e38-e360.
- 405 2. Greer DM, Rosenthal ES, Wu O. Neuroprognostication of hypoxic-ischaemic coma in the  
406 therapeutic hypothermia era. *Nature reviews Neurology* 2014;10:190-203.
- 407 3. Velly L, Perlberg V, Boulier T, et al. Use of brain diffusion tensor imaging for the prediction of long-  
408 term neurological outcomes in patients after cardiac arrest: a multicentre, international, prospective,  
409 observational, cohort study. *Lancet Neurol* 2018;17:317-326.
- 410 4. Alderliesten T, De Vries LS, Staats L, et al. MRI and spectroscopy in (near) term neonates with  
411 perinatal asphyxia and therapeutic hypothermia. *Archives of Disease in Childhood: Fetal and Neonatal*  
412 *Edition* 2017;102:F147-F152.
- 413 5. Sijens PE, Wischniowsky K, ter Horst HJ. The prognostic value of proton magnetic resonance  
414 spectroscopy in term newborns treated with therapeutic hypothermia following asphyxia. *Magnetic*  
415 *Resonance Imaging* 2017;42:82-87.
- 416 6. Jennett B, Bond M. Assessment of outcome after severe brain damage. *Lancet* 1975;1:480-484.
- 417 7. Szumita PM, Baroletti S, Avery KKR, et al. Implementation of a Hospital-wide Protocol for Induced  
418 Hypothermia Following Successfully Resuscitated Cardiac Arrest. *Critical pathways in cardiology*  
419 2010;9:216-220.
- 420 8. Hirsch LJ, LaRoche SM, Gaspard N, et al. American Clinical Neurophysiology Society's Standardized  
421 Critical Care EEG Terminology: 2012 version. *J Clin Neurophysiol* 2013;30:1-27.
- 422 9. Westhall E, Rossetti AO, van Rootselaar AF, et al. Standardized EEG interpretation accurately  
423 predicts prognosis after cardiac arrest. *Neurology* 2016;86:1482-1490.
- 424 10. Jehi L, Yardi R, Chagin K, et al. Development and validation of nomograms to provide  
425 individualised predictions of seizure outcomes after epilepsy surgery: a retrospective analysis. *The Lancet*  
426 *Neurology* 2015;14:283-290.
- 427 11. Kreis R, Arcinue E, Ernst T, Shonk TK, Flores R, Ross BD. Hypoxic encephalopathy after near-  
428 drowning studied by quantitative 1H-magnetic resonance spectroscopy. Metabolic changes and their  
429 prognostic value. *Journal of Clinical Investigation* 1996;97:1142-1154.
- 430 12. Lawley JS, Macdonald JH, Oliver SJ, Mullins PG. Unexpected reductions in regional cerebral  
431 perfusion during prolonged hypoxia. *The Journal of Physiology* 2016;00:1-13.
- 432 13. Rowland BC, Liao H, Adan F, Mariano L, Irvine J, Lin AP. Correcting for Frequency Drift in Clinical  
433 Brain MR Spectroscopy. *Journal of Neuroimaging* 2017;27:23-28.
- 434 14. Provencher SW. Estimation of metabolite concentrations from localized in vivo proton NMR  
435 spectra. *Magnetic resonance in medicine : official journal of the Society of Magnetic Resonance in*  
436 *Medicine / Society of Magnetic Resonance in Medicine* 1993;30:672-679.
- 437 15. Kreis R. The trouble with quality filtering based on relative Cramer-Rao lower bounds. *Magn Reson*  
438 *Med* 2016;75:15-18.
- 439 16. Benjamini Y, Hochberg Y. Controlling the false discovery rate: a practical and powerful approach  
440 to multiple testing. *Journal of the Royal Statistical Society B* 1995;57:289-300.
- 441 17. Youden WJ. Index for rating diagnostic tests. *Cancer* 1950;3:32-35.
- 442 18. Steinbusch CVM, van Heugten CM, Rasquin SMC, Verbunt JA, Moolaert VRM. Cognitive  
443 impairments and subjective cognitive complaints after survival of cardiac arrest: A prospective  
444 longitudinal cohort study. *Resuscitation* 2017;120:132-137.
- 445 19. Nespoli F, Redaelli S, Ruggeri L, Fumagalli F, Olivari D, Ristagno G. A complete review of preclinical  
446 and clinical uses of the noble gas argon: Evidence of safety and protection. *Ann Card Anaesth* 2019;22:122-  
447 135.
- 448 20. Salamah A, Mehrez M, Faheem A, El Amrousy D. Efficacy of Citicoline as a Neuroprotector in  
449 children with post cardiac arrest: a randomized controlled clinical trial. *Eur J Pediatr* 2020.

- 450 21. Sener RN. Diffusion MRI: apparent diffusion coefficient (ADC) values in the normal brain and a  
451 classification of brain disorders based on ADC values. *Comput Med Imaging Graph* 2001;25:299-326.
- 452 22. Moffett JR, Ross B, Arun P, Madhavarao CN, Namboodiri AM. N-Acetylaspartate in the CNS: from  
453 neurodiagnostics to neurobiology. *Prog Neurobiol* 2007;81:89-131.
- 454 23. Pan JW, Takahashi K. Interdependence of N-acetyl aspartate and high-energy phosphates in  
455 healthy human brain. *Ann Neurol* 2005;57:92-97.
- 456 24. Ruijter BJ, Tjepkema-Cloostermans MC, Tromp SC, et al. Early electroencephalography for  
457 outcome prediction of postanoxic coma: A prospective cohort study. *Ann Neurol* 2019;86:203-214.
- 458 25. Munoz Maniega S, Cvorov V, Chappell FM, et al. Changes in NAA and lactate following ischemic  
459 stroke: a serial MR spectroscopic imaging study. *Neurology* 2008;71:1993-1999.
- 460 26. Chan K W Y, Chow AM, Chan KC, Yang J, Wu EX. Magnetic resonance spectroscopy of the brain  
461 under mild hypothermia indicates changes in neuroprotection-related metabolites. *Neuroscience Letters*  
462 2010;475:150-155.
- 463 27. Schramm AE, Carton-Leclercq A, Diallo S, et al. Identifying neuronal correlates of dying and  
464 resuscitation in a model of reversible brain anoxia. *Prog Neurobiol* 2020;185:101733.
- 465 28. Lorek A, Takei Y, Cady EB, et al. Delayed ("secondary") cerebral energy failure after acute hypoxia-  
466 ischemia in the newborn piglet: continuous 48-hour studies by phosphorus magnetic resonance  
467 spectroscopy. *Pediatr Res* 1994;36:699-706.
- 468 29. Huang BY, Castillo M. Hypoxic-ischemic brain injury: imaging findings from birth to adulthood.  
469 *Radiographics* 2008;28:417-439; quiz 617.
- 470 30. Pang R, Martinello KA, Meehan C, et al. Proton Magnetic Resonance Spectroscopy Lactate/N-  
471 Acetylaspartate Within 48 h Predicts Cell Death Following Varied Neuroprotective Interventions in a Piglet  
472 Model of Hypoxia-Ischemia With and Without Inflammation-Sensitization. *Front Neurol* 2020;11:883.
- 473 31. Penrice J, Cady EB, Lorek A, et al. Proton magnetic resonance spectroscopy of the brain in normal  
474 preterm and term infants, and early changes after perinatal hypoxia-ischemia. *Pediatr Res* 1996;40:6-14.
- 475 32. Lally PJ, Montaldo P, Oliveira V, et al. Magnetic resonance spectroscopy assessment of brain injury  
476 after moderate hypothermia in neonatal encephalopathy: a prospective multicentre cohort study. *The*  
477 *Lancet Neurology* 2019;18:35-45.
- 478 33. Attwell D, Laughlin SB. An energy budget for signaling in the grey matter of the brain. *J Cereb*  
479 *Blood Flow Metab* 2001;21:1133-1145.
- 480 34. Hofmeijer J, van Putten MJ. Ischemic cerebral damage: an appraisal of synaptic failure. *Stroke*  
481 2012;43:607-615.
- 482 35. Buzsaki G, Anastassiou CA, Koch C. The origin of extracellular fields and currents--EEG, ECoG, LFP  
483 and spikes. *Nat Rev Neurosci* 2012;13:407-420.
- 484 36. Ruijter BJ, Hofmeijer J, Meijer HGE, van Putten M. Synaptic damage underlies EEG abnormalities  
485 in postanoxic encephalopathy: A computational study. *Clin Neurophysiol* 2017;128:1682-1695.
- 486 37. Dao DN, Ahdab-Barmada M, Schor NF. Cerebellar glutamine synthetase in children after hypoxia  
487 or ischemia. *Stroke* 1991;22:1312-1316.
- 488 38. Kobayashi S, Millhorn DE. Hypoxia regulates glutamate metabolism and membrane transport in  
489 rat PC12 cells. *J Neurochem* 2001;76:1935-1948.
- 490 39. Chandrasekaran VP, Viswanathan R, Venkatasubramanian TA. Glutamine synthetase, glutaminase  
491 and phosphodiesterase activities in brain under hypoxia: in vitro effect of cortisol, GABA and serotonin on  
492 glutamine synthetase. *Environ Physiol Biochem* 1975;5:373-377.
- 493 40. Shibasaki J, Aida N, Morisaki N, Tomiyasu M, Nishi Y, Toyoshima K. Changes in Brain Metabolite  
494 Concentrations after Neonatal Hypoxic-ischemic Encephalopathy. *Radiology* 2018;288:840-848.
- 495 41. Wu O, Sorensen AG, Benner T, Singhal AB, Furie KL, Greer DM. Comatose patients with cardiac  
496 arrest: predicting clinical outcome with diffusion-weighted MR imaging. *Radiology* 2009;252:173-181.

498 **Figure Legends**

499

500 Figure 1: MRS voxel placement and representative spectra in patients with good and poor  
501 outcome

502 Placement of the MRS voxels: A) Posterior cingulate gyrus (PCG); B) Posterior white matter  
503 (PWM); C) Basal ganglia (BG); D) Brainstem (BS). Spectra of illustrative patients with good  
504 outcomes (A1-D1) or poor outcomes (A2-D2).

505

506 Figure 2: Posterior cingulate gyrus (PCG) NAA/Cr ratios in patient populations  
507 Boxplots of PCG NAA/Cr levels patients who had no coma recovery (did not follow commands),  
508 recovery (followed commands), and normative control subjects

509

510 Figure 3: Relationship between cortical ADC vs posterior cingulate gyrus (PCG) NAA/Cr, PCG  
511 lactate, and coma recovery

512 A) Linear relationship between cortical ADC and PCG NAA/Cr. The red line represents the  
513 optimal cut-off for recovery to follow commands. B) Inverse log-linear relationship between  
514 cortical ADC and PCG lactate. The red line represents the optimal cut-off for recovery to follow  
515 commands. The blue line represents cut-off with the specificity of recovery set to 100%. C) and  
516 D) Relationship between % of cortical voxels with ADC < 650 mm<sup>2</sup>/s and NAA/Cr (C) and log of  
517 PCG lactate (D).

518

519 Figure 4: Illustration of the relationship between MRS, MRI, EEG, and outcome after cardiac  
520 arrest

521 Summary of MRS and ADC peaks after TTM. NAA/Cr/Cr values higher than 0.98 and ADC  
522 values over 1071 resulted in universal good come with coma recovery. The appearance of  
523 lactate resulted in a poor outcome. Patients between these values (in purple) have the potential

524 for coma recovery. For illustrative purposes, diffusion-weighted images are shown rather than  
525 ADC maps.

526 **Table 1: Characteristics of the study population**

|                                          | No coma recovery<br>(n=36) | Coma recovery<br>(n=14) | p-value |
|------------------------------------------|----------------------------|-------------------------|---------|
| <b>Age in years (standard deviation)</b> | 61.2 (11.9)                | 60.1 (15.0)             | 0.81    |
| <b>Sex</b>                               |                            |                         | 0.52    |
| M                                        | 21 (58.3%)                 | 10 (71.4%)              |         |
| <b>†Pulseless rhythm</b>                 |                            |                         | 0.31    |
| VT/VF                                    | 9 (25.7%)                  | 6 (42.9%)               |         |
| Non-shockable                            | 26 (74.3%)                 | 8 (57.1%)               |         |
| <b>CPC at discharge</b>                  |                            |                         | <0.001* |
| 1-2                                      | 0                          | 12<br>CPC1=4<br>CPC2=8  |         |
| 3-5                                      | 36<br>CPC4=3<br>CPC5=33    | 2<br>CPC3=1<br>CPC5=1   |         |
| <b>‡CPC at 3-6 months</b>                |                            |                         | <0.001* |
| 1-2                                      | 0                          | 10<br>CPC1=6<br>CPC2=4  |         |
| 3-5                                      | 36<br>CPC4=1<br>CPC5=35    | 3<br>CPC5=3             |         |
| Days to WLST (interquartile range)       | 6 (6)                      |                         |         |

|                                                                           |                 |               |         |
|---------------------------------------------------------------------------|-----------------|---------------|---------|
|                                                                           |                 |               |         |
|                                                                           |                 |               |         |
| <b>§Target temperature</b>                                                |                 |               | 0.52    |
| 33                                                                        | 31 (88.9%)      | 11 (84.7%)    |         |
| 36                                                                        | 4 (11.1%)       | 2 (15.4%)     |         |
| <b>Clinical exam</b>                                                      |                 |               |         |
| Pupillary reflexes (%)                                                    | 26 (72.2%)      | 14 (100%)     | 0.045   |
| Corneal reflexes (%)                                                      | 20 (55.6%)      | 14 (100%)     | 0.002*  |
| Motor exam flexion or better (%)                                          | 4 (11.1%)       | 14 (100%)     | <0.001* |
| <b>MRI</b>                                                                |                 |               |         |
| Median % whole brain voxels with ADC below 650 mm <sup>2</sup> /s (range) | 22.9 (1.2-95.9) | 2.5 (0.9-6.1) | <0.001* |
| Median % cortical voxels with ADC under 650 mm <sup>2</sup> /s (range)    | 19.6 (1.2-95.6) | 2.1 (0.6-4.6) | <0.001* |
| Whole brain ADC (mean, sd)                                                | 869.7 (157.7)   | 998.7 (60.5)  | <0.001* |
| Cortex ADC (mean, sd)                                                     | 923.3 (108.7)   | 1080.4 (78.1) | <0.001* |
| White matter ADC (mean, sd)                                               | 777.1 (142.8)   | 828.3 (49.8)  | <0.001* |
| Acc ADC (mean, sd)                                                        | 835.6 (156.7)   | 880.7 (102.1) | 0.24    |
| Caudate ADC (mean, sd)                                                    | 901.0 (170.4)   | 969.2 (116.0) | 0.12    |
| Putamen ADC (mean, sd)                                                    | 717.6 (123.9)   | 796.4 (46.6)  | 0.002*  |
| Thalamus ADC (mean, sd)                                                   | 880.0 (128.8)   | 925.0 (46.7)  | 0.076   |
| Basal ganglia ADC (mean, sd)                                              | 842.7 (130.7)   | 905.0 (73.2)  | 0.039   |
| Amygdala ADC (mean, sd)                                                   | 980.6 (158.8)   | 1002.1 (77.9) | 0.53    |



|                                                           |               |                |         |
|-----------------------------------------------------------|---------------|----------------|---------|
| Hippocampus ADC (mean, sd)                                | 995.7 (175.2) | 1089.0 (116.3) | 0.035   |
| Cerebellum ADC (mean, sd)                                 | 838.9 (150.5) | 929.4 (82.7)   | 0.010*  |
| <b>EEG on day of MRI/MRS</b>                              |               |                |         |
| Continuous/nearly continuous                              | 7 (19.4%)     | 14 (100%)      | <0.001* |
| Discontinuous, burst suppressed, or completely suppressed | 29 (80.6%)    | 0 (0%)         |         |
| Generalized periodic discharges                           | 16 (44.4%)    | 9 (64.3%)      | 0.35    |
| Myoclonus                                                 | 6 (16.7%)     | 4 (28.6%)      | 0.44    |
| Status epilepticus                                        | 6 (16.7%)     | 2 (14.3%)      | 1       |
| Reactivity-yes                                            | 8 (33.3%)     | 10 (100%)      | <0.001* |
| Reactivity-no                                             | 16 (66.7%)    | 0 (0%)         |         |
| Somatosensory evoked potential                            |               |                |         |
| N20 present at least one limb                             | 2             | 1              |         |
| Absent                                                    | 1             | 0              |         |
| Neuron specific enolase                                   |               |                |         |
| >33ng/mL                                                  | 6             | 1              |         |
| <33ng/mL                                                  | 2             | 2              |         |

527 \*Statistically significant after correction for multiple comparisons (FDR=0.05). †Rhythm  
528 unknown in one patient; ‡One patient lost to follow-up. §Fever avoided in 2 patients but did not  
529 undergo TTM; ||Reactivity not tested or ascertainable in 16 patients. P-values not calculated for  
530 somatosensory evoked potential studies and neuron specific enolase due to the small number  
531 of subjects

532 **Table 2: MRS peaks vs outcome**

|             | No coma<br>recovery (n=30)<br>Median (IQR) | Coma recovery<br>(n=12)<br>Median (IQR) | p-value (Wilcoxon) |
|-------------|--------------------------------------------|-----------------------------------------|--------------------|
| <b>PCG</b>  |                                            |                                         |                    |
| NAA+NAAG/Cr | 0.82 (0.29)                                | 1.26 (0.17)                             | <0.001*            |
| Lac/Cr      | 0.39 (0.51)                                | 0.04 (0.06)                             | <0.001*            |
| Glu/Cr      | 0.90 (0.25)                                | 1.12 (0.24)                             | 0.007*             |
| Gln/Cr      | 1.01 (0.75)                                | 0.49 (0.23)                             | <0.001*            |
| Glx/Cr      | 2.10 (0.63)                                | 1.56 (0.40)                             | 0.002              |
| MI/Cr       | 0.55 (0.23)                                | 0.69 (0.15)                             | 0.028              |
| <b>PWM</b>  |                                            |                                         |                    |
| NAA+NAAG/Cr | 1.48 (0.33)                                | 1.71 (0.19)                             | 0.016              |
| Lac/Cr      | 0.22 (0.23)                                | 0.08 (0.11)                             | 0.005              |
| Glu/Cr      | 0.83 (0.17)                                | 0.83 (0.23)                             | 0.91               |
| Gln/Cr      | 0.47 (0.37)                                | 0.41 (0.16)                             | 0.19               |
| Glx/Cr      | 1.36 (0.41)                                | 1.30 (0.45)                             | 0.24               |
| MI/Cr       | 0.80 (0.25)                                | 0.77 (0.11)                             | 0.89               |
| <b>BG</b>   |                                            |                                         |                    |
| NAA+NAAG/Cr | 0.75 (0.19)                                | 0.73 (0.15)                             | 0.92               |
| Lac/Cr      | 0.14 (0.18)                                | 0.015 (0.080)                           | 0.01               |
| Glu/Cr      | 0.90 (0.19)                                | 0.95 (0.16)                             | 0.94               |
| Gln/Cr      | 0.85 (0.57)                                | 0.65 (0.22)                             | 0.06               |
| Glx/Cr      | 1.78 (0.61)                                | 1.53 (0.41)                             | 0.040              |

|             |             |              |       |
|-------------|-------------|--------------|-------|
| MI/Cr       | 0.53 (0.24) | 0.62 (0.34)  | 0.37  |
| <b>BS</b>   |             |              |       |
| NAA+NAAG/Cr | 1.49 (0.33) | 1.71 (0.19)  | 0.019 |
| Lac/Cr      | 0.22 (0.23) | 0.078 (0.11) | 0.007 |
| Glu/Cr      | 0.83 (0.17) | 0.83 (0.23)  | 0.98  |
| Gln/Cr      | 0.48 (0.36) | 0.41 (0.16)  | 0.17  |
| Glx/Cr      | 1.40 (0.42) | 1.30 (0.45)  | 0.20  |
| MI/Cr       | 0.79 (0.25) | 0.77 (0.11)  | 0.97  |

533 \*Statistically significant after correction for multiple comparisons (FDR=0.05); Glu: glutamine;

534 Glu: glutamate; Glx: Glu+Gln

535 **Table 3: ROC and cut-off values**

|               | <b>AUC</b> | <b>Optimal cut-off</b> | <b>Sensitivity and specificity at optimal cut-off</b> | <b>Cut-off required for 100% sensitivity for coma recovery; specificity</b> |
|---------------|------------|------------------------|-------------------------------------------------------|-----------------------------------------------------------------------------|
| <b>PCG</b>    |            |                        |                                                       |                                                                             |
| NAA/Cr        | 0.96       | 1.11                   | 85.7%, 88.9%                                          | 0.98, 77.8%                                                                 |
| Lac/Cr        | 0.91       | 0.14                   | 83.3%, 92.9%                                          | 0, 0%                                                                       |
| Lac/NAA       | 0.93       | 0.12                   | 86.1%, 100.0%                                         | 0, 0%                                                                       |
| <b>PWM</b>    |            |                        |                                                       |                                                                             |
| NAA/Cr        | 0.72       | 1.52                   | 85.7%, 61.1%                                          | 1.23, 19.4%                                                                 |
| Lac/Cr        | 0.76       | 0.16                   | 66.7, 85.7%                                           | 0, 0%                                                                       |
| Lac/NAA       | 0.77       | 0.091                  | 65.7%, 85.7%                                          | 0, 0%                                                                       |
| <b>BG</b>     |            |                        |                                                       |                                                                             |
| NAA/Cr        | 0.48       | 0.73                   | 55.6%, 47.1%                                          | 0.64, 23.5%                                                                 |
| Lac/Cr        | 0.81       | 0.112                  | 70.6%, 88.9%                                          | 0, 0%                                                                       |
| Lac/NAA       | 0.78       | 0.11                   | 76.5%, 77.8%                                          | 0, 0%                                                                       |
| <b>BS</b>     |            |                        |                                                       |                                                                             |
| NAA/Cr        | 0.56       | 1.92                   | 50.0%, 76.0%                                          | 0.99, 8.0%                                                                  |
| Lac/Cr        | 0.52       | 0.096                  | 48.0%, 70.0%                                          | 0, 0%                                                                       |
| Lac/NAA       | 0.48       | 0.058                  | 45.8%, 60.0%                                          | 0, 0%                                                                       |
| <b>ADC</b>    |            |                        |                                                       |                                                                             |
| Whole brain   | 0.75       | 908.0                  | 100%, 58.3%                                           | 908.0, 58.3                                                                 |
| Cortex        | 0.78       | 989.0                  | 92.9%, 61.1%                                          | 950.0, 55.6%                                                                |
| Hippocampus   | 0.65       | 1051.4                 | 64.3, 55.6%                                           | 921.6, 27.8%                                                                |
| Thalamus      | 0.57       | 927.6                  | 50.0, 61.1%                                           | 856.7, 27.8%                                                                |
| White matter  | 0.76       | 821.9                  | 92.9%, 61.1%                                          | 802.5, 58.3%                                                                |
| Basal ganglia | 0.67       | 843.2                  | 85.7%, 50.0%                                          | 806.2, 33.3%                                                                |
| Cerebellum    | 0.70       | 904.4                  | 71.4%, 66.7%                                          | 810.7, 38.9%                                                                |

537 Appendix 1: Authors

|                       |                              |                                                                                                                     |
|-----------------------|------------------------------|---------------------------------------------------------------------------------------------------------------------|
| Jong Woo Lee, MD, PhD | Brigham and Women's Hospital | Design and conceptualized study; analyzed and interpreted the data; drafted the manuscript for intellectual content |
| Lasya Sreepada, BS    | Brigham and Women's Hospital | Analyzed the data; drafted the manuscript for intellectual content                                                  |
| Matthew Bevers        | Brigham and Women's Hospital | Interpreted the data; revised the manuscript for intellectual content                                               |
| Karen Li, BBA         | Brigham and Women's Hospital | Analyzed the data; revised the manuscript for intellectual content                                                  |
| Benjamin Scirica, MD  | Brigham and Women's Hospital | Major role in the acquisition of data; interpreted the data; revised the manuscript for intellectual content        |
| Danuzia Silva, RN     | Brigham and Women's Hospital | Major role in the acquisition of data; revised the manuscript for intellectual content                              |
| Galen Henderson, MD   | Brigham and Women's Hospital | Interpreted the data; revised the manuscript for intellectual content                                               |
| Camden Bay, PhD       | Brigham and Women's Hospital | Analyzed and interpreted the data; revised the manuscript for intellectual content                                  |
| Alexander Lin, PhD    | Brigham and Women's Hospital | Design and conceptualized study; analyzed and interpreted the data; drafted the manuscript for intellectual content |

538

539

Figure 1

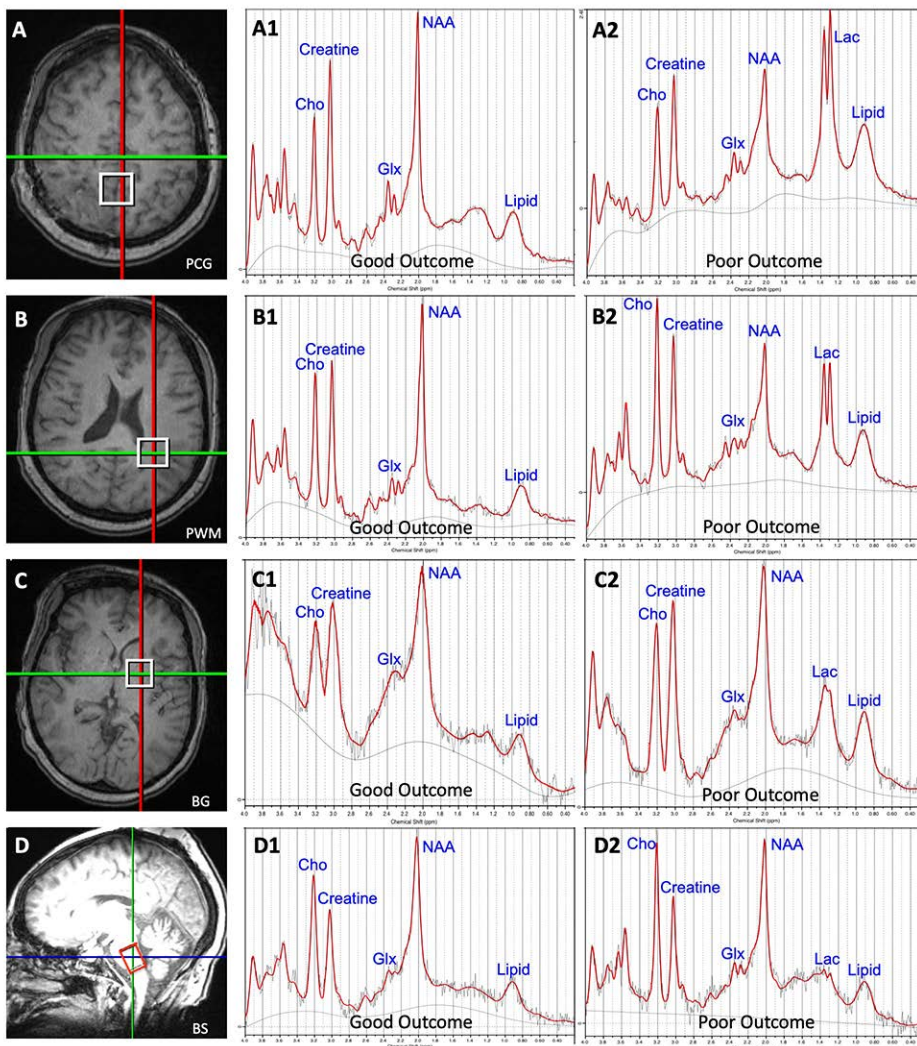

Figure 2

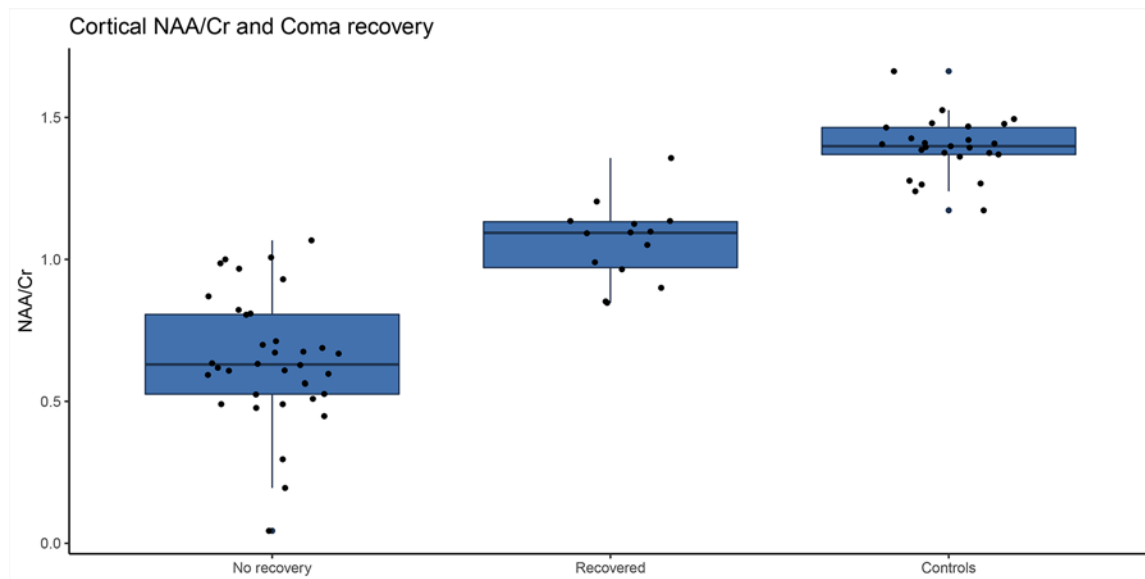

Figure 3

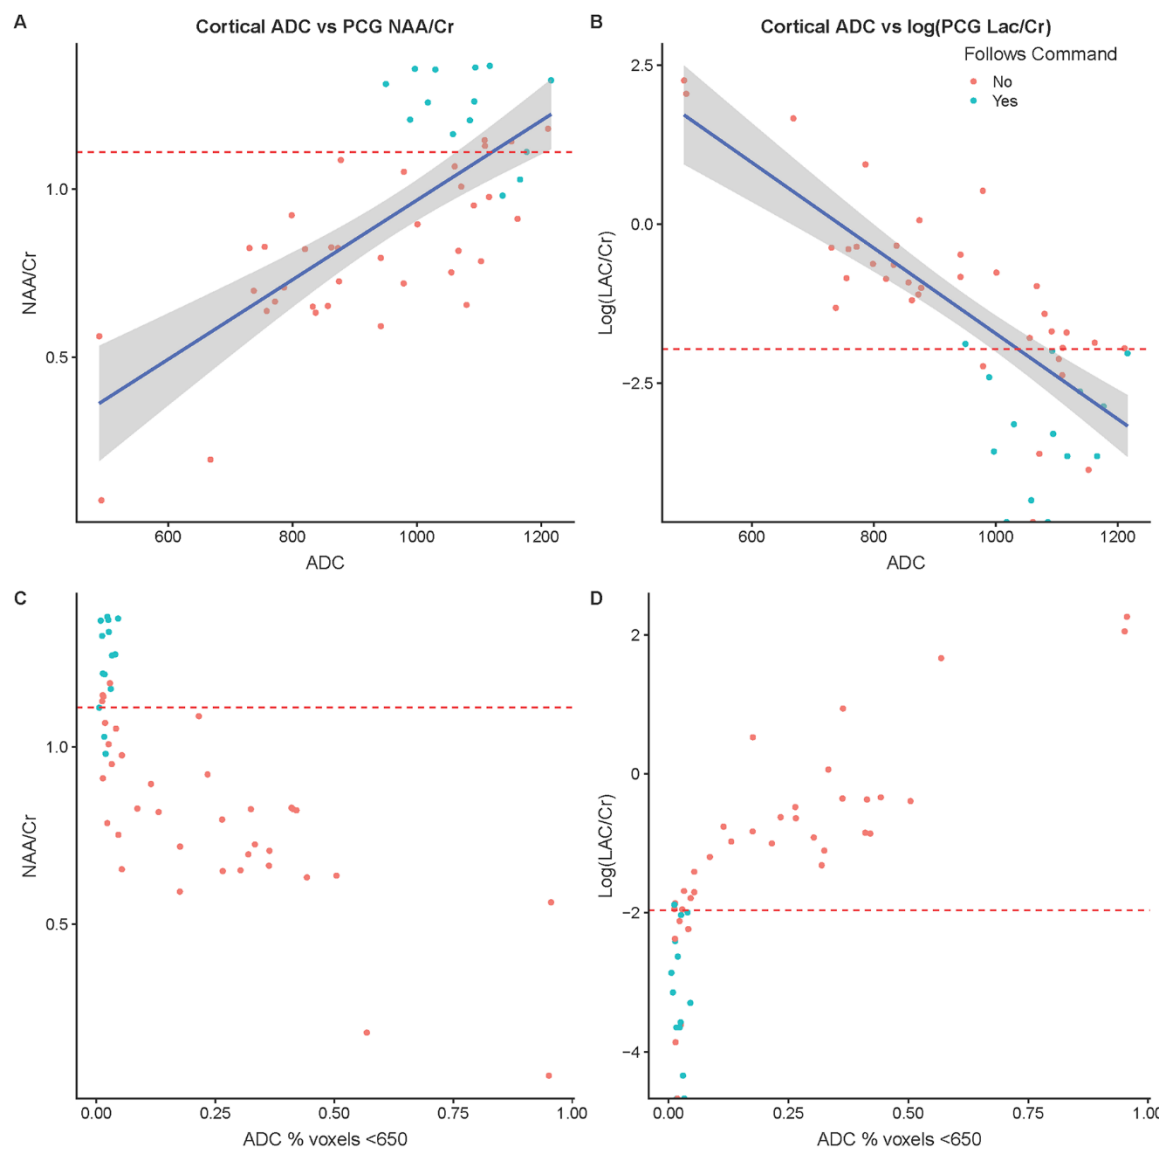



Figure 4

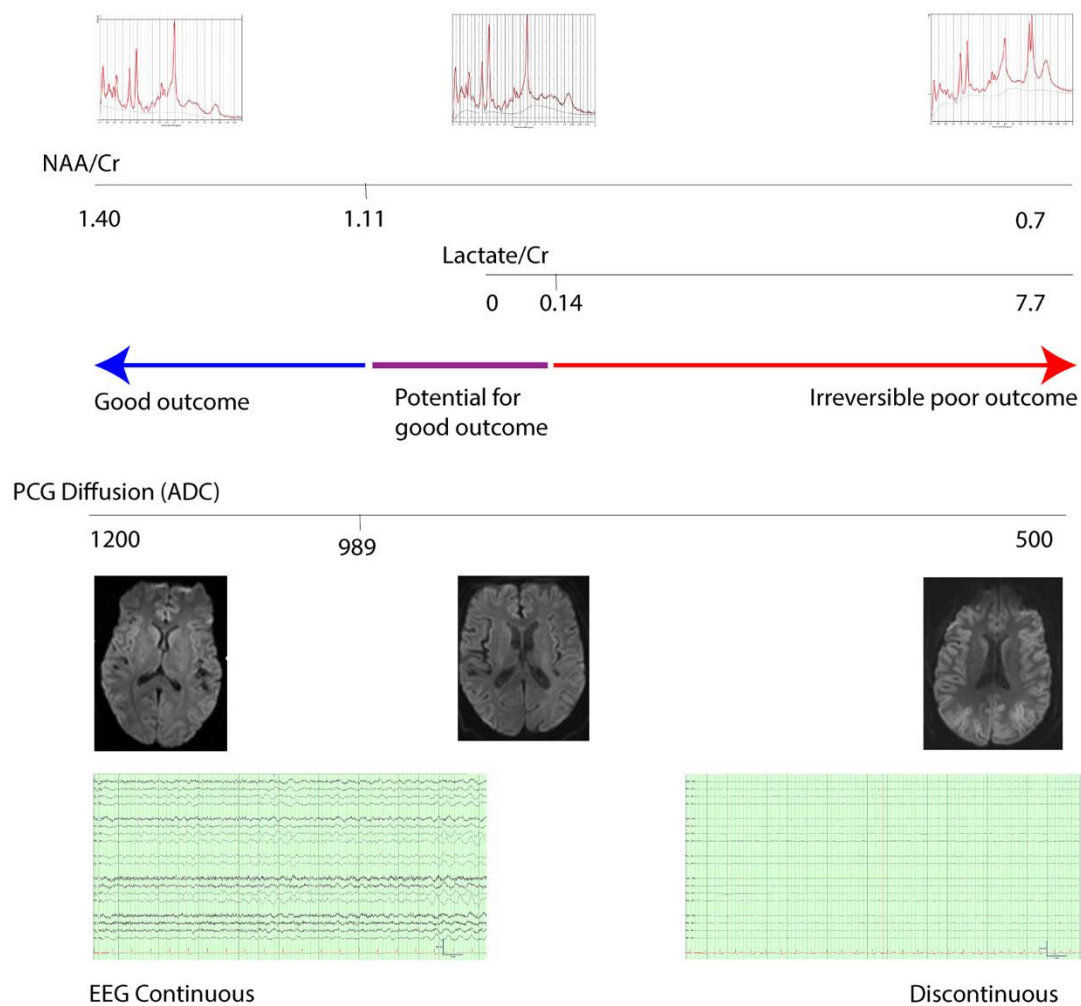

Source: https://medrxiv.org/content/10.1101/2021.05.13.21257029v1.full.pdf
